# Supplementary material for: Leishmania donovani Infection Causes Distinct Epigenetic DNA Methylation Changes in Host Macrophages
Source: PLoS Pathog. 2014 Oct 9;10(10):e1004419. doi: 10.1371/journal.ppat.1004419 (PMC4192605; doi:10.1371/journal.ppat.1004419)
Supplement: Table S2 — CpG sites with increased or decreased methylation in live infected versus heat killed treated human macrophages. (XLS) [file ppat.1004419.s003.xls]

## Sheet: InHK-supTab2
Table S2. CpG sites with increased or decreased methylation in live infected versus heat killed treated human macrophages.
CpG site	average methylation score live infected	average methylation score heat killed treated	Δ Beta value live infected versus heat killed treated	UCSC_REFGENE_ACCESSION	UCSC_REFGENE_NAME		firstexon5UTRnHits	firstexon5UTRAccessions	firstexonBodynHits	firstexonBodyAccessions	firstexon3UTRnHits	firstexon3UTRAccessions	exon5UTRnHits	exon5UTRAccessions	exonBodynHits	exonBodyAccessions	exon3UTRnHits	exon3UTRAccessions	intron5UTRnHits	intron5UTRAccessions	intronBodynHits	intronBodyAccessions	intron3UTRnHits	intron3UTRAccessions
cg14339867	0.614388	0.923792	-0.309404	NM_138430	ADPRHL1		0		1	NM_138430	0		0		0		0		0		0		0
cg13526469	0.675616	0.970649	-0.295034				0		0		0		0		0		0		0		0		0
cg10786876	0.748482	0.949796	-0.201314	NM_001958	EEF1A2		0		0		0		0		1	NM_001958	0		0		0		0
cg03826759	0.767266	0.965941	-0.198674	NM_031898	TEKT3		0		0		0		0		1	NM_031898	0		0		0		0
cg04085039	0.724283	0.910973	-0.18669	NM_020825	CRAMP1L		0		0		0		0		0		0		0		1	NM_020825	0
cg25889035	0.694175	0.871208	-0.177033	NM_014914	AGAP1		0		0		0		0		0		0		0		2	NM_001037131;NM_014914	0
cg09901100	0.61875	0.770091	-0.15134				0		0		0		0		0		0		0		0		0
cg03611151	0.725995	0.873696	-0.147701	NM_001841	CNR2		0		0		0		0		0		0		1	NM_001841	0		0
cg13286582	0.711756	0.857917	-0.14616	NM_006449	CDC42EP3		0		0		0		0		0		0		4	NM_001270436;NM_001270437;NM_001270438;NM_006449	0		0
cg06554036	0.813736	0.957546	-0.14381				0		0		0		0		0		0		0		0		0
cg05984948	0.541547	0.683761	-0.142215				0		0		0		0		0		0		0		0		0
cg02070232	0.775877	0.916284	-0.140407	NM_207437	DNAH10		0		0		0		0		1	NM_207437	0		0		0		0
cg14987354	0.742934	0.88254	-0.139606				0		0		0		0		0		0		0		0		0
cg26916687	0.80078	0.937778	-0.136998				0		0		0		0		0		0		0		0		0
cg00863716	0.696809	0.833681	-0.136872	NM_205845	AKR1C2		0		0		0		0		0		0		0		0		0
cg02951695	0.671087	0.800827	-0.12974	NM_005539 ****	INPP5A		0		0		0		0		0		0		0		1	NM_005539	0
cg18845578	0.725384	0.853631	-0.128247	NM_006037	HDAC4		0		0		0		0		0		0		0		1	NM_006037	0
cg06638568	0.688927	0.817027	-0.1281	NM_152410	PACRG		0		0		0		0		0		0		0		3	NM_001080378;NM_001080379;NM_152410	0
cg17401890	0.817721	0.944587	-0.126866	NM_024841	PRR5L		0		0		0		0		0		0		0		4	NM_001160167;NM_001160168;NM_001160169;NM_024841	0
cg07861603	0.801516	0.928348	-0.126832	NM_001103175	CCDC64B		0		1	NM_001103175	0		0		0		0		1	NR_047572	0		0
cg20094085	0.608765	0.733854	-0.125089	NM_032439	PHYHIPL		0		0		0		0		0		0		0		0		0
cg27650678	0.495771	0.619802	-0.124031	NM_022172	PC		0		0		0		0		3	NM_000920;NM_001040716;NM_022172	0		0		0		0
cg19065773	0.713933	0.836923	-0.12299	NM_152309	PIK3AP1		0		0		0		0		1	NM_152309	0		0		0		0
cg21922468	0.402628	0.523995	-0.121366				0		0		0		0		0		0		0		0		0
cg00934882	0.832301	0.951055	-0.118754				0		0		0		0		0		0		0		0		0
cg05838113	0.6711	0.787495	-0.116395	NM_001164490	ADAM8		0		0		0		0		2	NM_001109;NM_001164490	0		0		1	NM_001164489	0
cg16075139	0.787167	0.902356	-0.115189	NM_004356	CD81		0		0		0		0		0		0		0		1	NM_004356	0
cg04873169	0.793937	0.909121	-0.115184	NM_015124	GRAMD4		0		0		0		0		0		0		0		0		0
cg26684363	0.71996	0.835071	-0.115112				0		0		0		0		0		0		0		0		0
cg24667405	0.779963	0.89316	-0.113197	NM_018490	LGR4		0		0		0		0		0		0		0		0		0
cg11857704	0.646693	0.758088	-0.111394				0		0		0		0		0		0		0		0		0
cg08435603	0.756542	0.867501	-0.110959	NR_024523	LOC641367		0		0		0		0		0		0		0		1	NM_173531	0
cg04303809	0.813218	0.91976	-0.106543				0		0		0		0		0		0		0		0		0
cg05344955	0.702458	0.808059	-0.105601				0		0		0		0		0		0		0		0		0
cg04053108	0.772646	0.878234	-0.105588	NM_000552	VWF		0		0		0		0		1	NM_000552	0		0		0		0
cg18238718	0.802755	0.906913	-0.104157	NM_152493	ZNF362		0		0		0		0		0		0		0		1	NM_152493	0
cg01115560	0.774499	0.876192	-0.101693	NM_020932	MAGEE1		0		0		0		0		0		0		0		0		0
cg00688681	0.853623	0.953786	-0.100163				0		0		0		0		0		0		0		0		0
cg19157647	0.800812	0.900966	-0.100155	NR_031591	MIR1180		0		0		0		0		0		0		0		3	NM_001243473;NM_001243475;NM_015681	0
cg21983178	0.770098	0.86669	-0.0965924	NM_024587	TMEM53		0		0		0		0		1	NM_024587	0		0		0		0
cg21348508	0.831985	0.926866	-0.0948813				0		0		0		0		0		0		0		0		0
cg10355814	0.783527	0.8773	-0.0937732	NM_005539 ****	INPP5A		0		0		0		0		0		0		0		1	NM_005539	0
cg01836954	0.776843	0.869218	-0.0923746	NM_001010854	TTC7B		0		0		0		0		0		0		0		1	NM_001010854	0
cg02505454	0.807271	0.899276	-0.0920049				0		0		0		0		0		0		0		0		0
cg24505892	0.753683	0.843242	-0.089559				0		0		0		0		0		0		0		0		0
cg14416293	0.823615	0.91237	-0.0887552	NM_020972	ZFYVE28		0		0		0		0		0		0		0		4	NM_001172656;NM_001172657;NM_001172658;NM_020972	0
cg03219611	0.830727	0.918629	-0.0879022	NM_001127441	CPA5		0		0		0		0		0		0		0		3	NM_001127441;NM_001127442;NM_080385	0
cg09287359	0.737707	0.823567	-0.0858603	NM_001042507	LGALS7B		0		0		0		0		0		0		0		0		0
cg17372996	0.812111	0.897781	-0.0856708				0		0		0		0		0		0		0		0		0
cg12475759	0.753696	0.839231	-0.0855351	NM_018836	AJAP1		0		0		0		0		0		0		0		0		0
cg22692549	0.833145	0.918444	-0.0852995				0		0		0		0		0		0		0		0		0
cg08694295	0.697191	0.78238	-0.0851887	NM_172084	CAMK2B		0		0		0		0		0		8	NM_001220;NM_172078;NM_172079;NM_172080;NM_172081;NM_172082;NM_172083;NM_172084	0		0		0
cg04221877	0.808626	0.893624	-0.0849979	NM_004350	RUNX3		0		0		0		0		0		0		0		1	NM_001031680	0
cg07389500	0.848222	0.932903	-0.0846804	NM_016605	FAM53C		0		0		0		0		2	NM_001135647;NM_016605	0		0		0		0
cg19777991	0.80326	0.887325	-0.0840654	NM_025135	FHOD3		0		0		0		0		0		0		0		1	NM_025135	0
cg26892843	0.806636	0.890416	-0.0837805				0		0		0		0		0		0		0		0		0
cg08493338	0.832634	0.916211	-0.0835771	NM_003502	AXIN1		0		0		0		0		0		0		0		2	NM_003502;NM_181050	0
cg16108230	0.779512	0.862543	-0.0830309				0		0		0		0		0		0		0		0		0
cg06673684	0.786644	0.869584	-0.0829404	NM_001112732	MCF2L		0		0		0		0		0		0		0		1	NM_001112732	0
cg13076843	0.835602	0.91803	-0.0824278	NM_001005498	RHBDF2		0		0		0		0		2	NM_001005498;NM_024599	0		0		0		0
cg09072576	0.734113	0.816025	-0.0819117	NM_053004	GNB1L		0		0		0		0		0		1	NM_024627	1	NM_053004	0		0
cg00006626	0.861793	0.943463	-0.0816705	NM_001159484	NUP210L		0		2	NM_001159484;NM_207308	0		0		0		0		0		0		0
cg00594907	0.84238	0.923342	-0.0809615	NM_001215 **	CA6		0		0		0		0		0		0		0		0		0
cg08204155	0.84216	0.9227	-0.0805391	NM_013373	ZDHHC8		0		0		0		0		0		1	NM_013373	0		1	NM_001185024	0
cg25331550	0.778019	0.858349	-0.0803302	NM_173660	DOK7		0		0		0		0		0		0		0		2	NM_001164673;NM_173660	0
cg04268432	0.797055	0.876925	-0.0798697	NM_021197	WFDC1		0		0		0		0		0		0		0		1	NM_021197	0
cg03403440	0.864223	0.942492	-0.0782685	NM_014700	RAB11FIP3		0		0		0		0		0		0		0		2	NM_001142272;NM_014700	0
cg02537091	0.873331	0.951004	-0.0776727	NM_024885	TAF7L		0		1	NM_024885	0		0		0		0		0		0		0
cg24107750	0.860335	0.937415	-0.0770798	NM_006257	PRKCQ		0		0		0		0		0		0		2	NM_001242413;NM_006257	0		0
cg01433332	0.767201	0.844071	-0.0768697				0		0		0		0		0		0		0		0		0
cg18194483	0.853042	0.929667	-0.0766242	NM_002840	PTPRF		0		0		0		0		2	NM_002840;NM_130440	0		0		0		0
cg17142091	0.797716	0.874017	-0.0763003	NM_001012393	OPCML		0		0		0		0		0		0		0		1	NM_001012393	0
cg24637308	0.838072	0.912443	-0.0743711	NM_144666	DNHD1		0		0		0		0		1	NM_144666	0		0		0		0
cg02819828	0.822801	0.895514	-0.0727137	NM_001127217	SMAD9		0		0		0		2	NM_001127217;NM_005905	0		0		0		0		0
cg00513981	0.812276	0.884381	-0.0721048	NM_003088	FSCN1		0		0		0		0		0		0		0		1	NM_003088	0
cg13166642	0.870956	0.943043	-0.0720872				0		0		0		0		0		0		0		1	NM_001200049	0
cg26931527	0.872074	0.943866	-0.0717919				0		0		0		0		0		0		0		0		0
cg27598195	0.83244	0.903751	-0.0713112				0		0		0		0		0		0		0		0		0
cg16136385	0.838858	0.910106	-0.0712475	NM_014756	CKAP5		0		0		0		0		0		0		2	NM_001008938;NM_014756	0		0
cg07801448	0.852547	0.923237	-0.0706893	NM_017581	CHRNA9		0		0		0		0		0		1	NM_017581	0		0		0
cg14007036	0.825714	0.896366	-0.0706528	NM_054021	GPR101		0		1	NM_054021	0		0		0		0		0		0		0
cg03402120	0.810028	0.880234	-0.0702056				0		0		0		0		0		0		0		0		0
cg11824764	0.831362	0.900599	-0.0692368	NM_001163034	RPTOR		0		0		0		0		0		0		0		2	NM_001163034;NM_020761	0
cg26738614	0.845576	0.912915	-0.0673388	NM_001163925	LRTM2		3	NM_001039029;NM_001163925;NM_001163926	0		0		0		0		0		0		1	NM_172364	0
cg05998672	0.884886	0.952011	-0.0671251	NM_012305	AP2A2		0		0		0		0		0		0		0		2	NM_001242837;NM_012305	0
cg09556447	0.842068	0.909134	-0.0670662	NM_153370	PI16		0		0		0		0		2	NM_001199159;NM_153370	0		0		0		0
cg02322435	0.867583	0.933434	-0.065851	NM_006053	TCIRG1		0		0		0		0		0		0		0		2	NM_006019;NM_006053	0
cg02812809	0.829829	0.895441	-0.0656114	NM_198445	RINL		0		0		0		0		2	NM_001195833;NM_198445	0		0		0		0
cg12940991	0.841345	0.906828	-0.0654836				0		0		0		0		0		0		0		0		0
cg00918422	0.914423	0.979477	-0.0650542	NM_003132	SRM		0		0		0		0		1	NM_003132	0		0		0		0
cg14945790	0.85393	0.918604	-0.0646734				0		0		0		0		0		0		0		0		0
cg02594183	0.860222	0.923429	-0.0632071	NM_001098816	ODZ4		0		0		0		0		0		1	NM_001098816	0		0		0
cg04516757	0.838121	0.900879	-0.0627587	NM_000941 **	POR		0		0		0		0		0		0		0		1	NM_000941	0
cg01791407	0.87975	0.941712	-0.0619617				0		0		0		0		0		0		0		0		0
cg06973164	0.881906	0.943509	-0.0616032				0		0		0		0		0		0		0		0		0
cg21437623	0.881263	0.94174	-0.0604766	NM_014629	ARHGEF10		0		0		0		0		1	NM_014629	0		0		0		0
cg22235407	0.880577	0.94067	-0.0600936	NM_032445	MEGF11		0		0		0		0		1	NM_032445	0		0		0		0
cg01682917	0.850193	0.910131	-0.0599373	NM_007368 **	RASA3		0		0		0		0		0		0		0		1	NM_007368	0
cg19947484	0.86548	0.924834	-0.0593541	NM_173465 **	COL23A1		0		0		0		0		0		0		0		1	NM_173465	0
cg10863922	0.89668	0.955545	-0.0588652	NM_004155	SERPINB9		0		0		0		0		1	NM_004155	0		0		0		0
cg21546821	0.866661	0.92534	-0.0586783				0		0		0		0		0		0		0		0		0
cg08835342	0.86012	0.918694	-0.0585738	NM_199285	PRR19		0		0		0		0		0		0		1	NM_199285	0		0
cg18451814	0.886489	0.945012	-0.0585222	NM_021728	OTX2		0		0		0		0		0		0		0		0		0
cg24641901	0.859342	0.917398	-0.0580566	NM_020179	C11orf75		0		0		0		0		1	NM_020179	0		0		0		0
cg21549299	0.813127	0.870295	-0.0571682	NR_026542	C21orf88		0		0		0		0		0		0		0		0		0
cg15303052	0.883552	0.940356	-0.0568047	NM_020728	ESYT2		0		0		0		0		0		1	NM_020728	0		0		0
cg10701252	0.91843	0.975027	-0.0565971	NM_003392	WNT5A		0		0		0		0		2	NM_001256105;NM_003392	0		0		0		0
cg04724176	0.899203	0.955668	-0.0564648				0		0		0		0		0		0		0		0		0
cg01881136	0.915882	0.971735	-0.0558528	NM_013275 **	ANKRD11		0		0		0		0		0		0		3	NM_001256182;NM_001256183;NM_013275	0		1	NR_045839
cg00151709	0.836348	0.892035	-0.0556869				0		0		0		0		0		0		0		0		0
cg26188698	0.887839	0.942711	-0.0548713	NM_002412	MGMT		0		0		0		0		0		0		0		1	NM_002412	0
cg02981703	0.896151	0.950279	-0.0541284	NM_001215 **	CA6		0		0		0		0		0		0		0		0		0
cg10492434	0.849705	0.90309	-0.0533846				0		0		0		0		0		0		0		0		0
cg04839409	0.883398	0.936706	-0.053308	NM_001329	CTBP2		0		0		0		0		0		0		0		3	NM_001083914;NM_001329;NM_022802	0
cg02092141	0.85963	0.912307	-0.0526774	NM_002896	RBM4		0		0		0		0		2	NM_001198845;NM_002896	0		0		3	NM_001198843;NM_001198844;NM_001198846	0
cg11732134	0.882717	0.934206	-0.0514888	NM_017766	CASZ1		0		0		0		0		0		0		0		2	NM_001079843;NM_017766	0
cg04600984	0.844613	0.895962	-0.0513494	NM_005427	TP73		0		0		0		0		0		0		6	NM_001204184;NM_001204185;NM_001204186;NM_001204187;NM_001204188;NM_005427	0		0
cg13662530	0.894847	0.945937	-0.0510903	NM_182848	CLDN10		0		0		0		0		0		0		0		2	NM_001160100;NM_182848	0
cg01886385	0.893627	0.944296	-0.0506698	NM_019105	TNXB		0		0		0		0		1	NM_019105	0		0		0		0
cg22870307	0.88295	0.933478	-0.050528				0		0		0		0		0		0		0		0		0
cg13715901	0.889386	0.939193	-0.0498071				0		0		0		0		0		0		0		0		0
cg12512173	0.89629	0.94605	-0.0497592	NM_001113511	ARHGEF7		0		0		0		0		0		0		0		5	NM_001113511;NM_001113512;NM_001113513;NM_003899;NM_145735	0
cg15212354	0.896324	0.945767	-0.0494428	NM_014974	DIP2C		0		0		0		0		0		0		0		1	NM_014974	0
cg00437166	0.851742	0.901067	-0.0493255	NM_003550 ***	MAD1L1		0		0		0		0		0		0		0		3	NM_001013836;NM_001013837;NM_003550	0
cg01852063	0.91848	0.967655	-0.0491755	NM_001287	CLCN7		0		0		0		0		2	NM_001114331;NM_001287	0		0		0		0
cg23626908	0.0768073	0.125939	-0.0491317				0		0		0		0		0		0		0		0		0
cg14331316	0.856944	0.905903	-0.0489587	NM_007001	SLC35D2		0		0		0		0		0		0		0		1	NM_007001	0
cg18585512	0.88627	0.934508	-0.048238	NM_001130004	ACTN1		0		0		0		0		0		0		0		3	NM_001102;NM_001130004;NM_001130005	0
cg20403557	0.873363	0.921243	-0.0478795	NM_173800	LVRN		0		0		0		0		0		0		0		1	NM_173800	0
cg07004744	0.890979	0.938813	-0.0478342	NM_207332 **	ERICH1		0		0		0		0		0		0		0		1	NM_207332	0
cg03898802	0.860892	0.908418	-0.0475252	NM_005128	DOPEY2		0		0		0		0		1	NM_005128	0		0		0		0
cg26810779	0.901863	0.949083	-0.04722	NM_175931	CBFA2T3		0		0		0		0		0		0		1	NM_175931	1	NM_005187	0
cg19130610	0.920784	0.967349	-0.0465655				0		0		0		0		0		0		0		0		0
cg19968619	0.922908	0.969192	-0.0462845				0		0		0		0		0		0		0		0		0
cg04101363	0.905246	0.951358	-0.0461119	NM_001164766	ZFHX3		0		0		0		0		2	NM_001164766;NM_006885	0		0		0		0
cg18980036	0.871924	0.917978	-0.0460538				0		0		0		0		0		0		0		1	NM_001200049	0
cg01209566	0.884209	0.929989	-0.0457807	NR_027321	LOC157381		0		0		0		0		0		0		0		0		0
cg03517024	0.925382	0.970521	-0.0451395	NM_032271	TRAF7		0		0		0		0		0		0		0		1	NM_032271	0
cg13296578	0.910367	0.955507	-0.0451394	NM_001080519	BAHCC1		0		0		0		0		1	NM_001080519	0		0		0		0
cg23730408	0.877431	0.921475	-0.044044				0		0		0		0		0		0		0		0		0
cg16466065	0.901763	0.945746	-0.0439831	NR_027255	LOC388428		0		0		0		0		0		0		1	NR_027255	0		0
cg27281030	0.887632	0.931382	-0.0437501	NM_144687	NLRP12		0		0		0		0		1	NM_144687	0		0		0		0
cg01800442	0.93504	0.978726	-0.0436862	NM_001145298	EXOC7		0		0		0		0		3	NM_001145297;NM_001145298;NM_001145299	0		0		2	NM_001013839;NM_015219	1	NR_028133
cg13397436	0.898601	0.942087	-0.043486	NM_001165899	PDE4D		0		0		0		0		0		0		0		2	NM_001104631;NM_001165899	0
cg02212575	0.900238	0.943438	-0.0431999				0		0		0		0		0		0		0		0		1	NR_034007
cg15712323	0.91641	0.959597	-0.0431865	NM_032281	ELAVL3		0		0		0		0		2	NM_001420;NM_032281	0		0		0		0
cg11520719	0.891738	0.934116	-0.0423789	NM_017519	ARID1B		0		0		0		0		0		0		0		2	NM_017519;NM_020732	0
cg09632029	0.936723	0.978994	-0.0422711	NM_001042450	SLC5A10		4	NM_001042450;NM_001270648;NM_001270649;NM_152351	0		0		0		0		0		1	NR_073067	0		0
cg03228985	0.886934	0.928818	-0.0418839				0		0		0		0		0		0		0		0		0
cg04950423	0.932074	0.973677	-0.0416032	NM_006312	NCOR2		0		0		0		0		0		0		0		3	NM_001077261;NM_001206654;NM_006312	0
cg06719728	0.905962	0.947514	-0.0415517	NM_152289	ZNF561		0		0		0		0		0		0		0		1	NM_152289	0
cg11638117	0.910806	0.95229	-0.0414836	NM_005634	SOX3		0		0		0		0		0		0		0		0		0
cg04988729	0.892654	0.934039	-0.0413847	NM_020901	PHRF1		0		0		0		0		1	NM_020901	0		0		0		0
cg01011276	0.922145	0.963326	-0.0411815	NM_001142864	FAM38A		0		0		0		0		0		0		0		1	NM_001142864	0
cg21593231	0.933261	0.974233	-0.0409717				0		0		0		0		0		0		0		0		0
cg08819022	0.897887	0.938757	-0.0408705				0		0		0		0		0		0		0		0		0
cg01764713	0.890509	0.931231	-0.0407219				0		0		0		0		0		0		0		0		0
cg11690824	0.898072	0.938574	-0.0405016	NR_029895	MIR331		0		0		0		0		0		0		0		0		0
cg18944135	0.904206	0.94423	-0.0400244				0		0		0		0		0		0		0		0		0
cg04840732	0.915778	0.955735	-0.0399575	NM_004686 **	MTMR7		0		0		0		0		0		1	NM_004686	0		0		0
cg15498513	0.907984	0.947527	-0.0395436	NM_001077511	TCF19		0		0		0		0		2	NM_001077511;NM_007109	0		0		0		0
cg08262464	0.896109	0.93529	-0.0391813	NM_000941 **	POR		0		0		0		0		1	NM_000941	0		0		0		0
cg26097051	0.918667	0.957823	-0.0391561	NM_007174	CIT		0		0		0		0		0		0		0		2	NM_001206999;NM_007174	0
cg13008631	0.9118	0.950755	-0.0389546	NM_005544	IRS1		0		1	NM_005544	0		0		0		0		0		0		0
cg19635505	0.932739	0.971323	-0.038584	NM_001109997	KLHL33		0		0		0		0		0		0		1	NM_001109997	0		0
cg05600626	0.918161	0.956236	-0.0380746	NM_152612	CCDC116		0		0		0		0		0		1	NM_152612	0		0		0
cg14830003	0.914443	0.952273	-0.0378293	NM_003462	DNALI1		0		1	NM_003462	0		0		0		0		0		0		0
cg01435178	0.916712	0.954263	-0.0375508	NM_145270	C16orf11		0		0		0		0		1	NM_145270	0		0		0		0
cg05407778	0.915481	0.952645	-0.0371645	NM_172028	ABTB1		0		0		0		1	NR_033429	2	NM_032548;NM_172027	0		0		0		0
cg26746037	0.914404	0.951406	-0.0370023	NM_015174	ZFR2		0		0		0		0		1	NM_015174	0		0		0		0
cg12456280	0.910381	0.947259	-0.0368781				0		0		0		0		0		0		0		0		0
cg03791434	0.897305	0.933432	-0.0361268	NM_000276	OCRL		0		0		0		0		0		0		0		2	NM_000276;NM_001587	0
cg17918326	0.914877	0.950722	-0.0358454	NM_015511	C20orf4		0		0		0		0		0		0		0		0		0
cg17523282	0.91287	0.948536	-0.0356656	NM_018649	H2AFY2		0		0		0		0		1	NM_018649	0		0		0		0
cg26783481	0.906165	0.941312	-0.0351467	NR_028080	FAM172A		0		0		0		0		0		0		0		3	NM_001163417;NM_001163418;NM_032042	1	NR_028080
cg21580588	0.933891	0.968428	-0.0345376	NM_023018	NADK		0		0		0		0		4	NM_001198993;NM_001198994;NM_001198995;NM_023018	0		0		0		0
cg23548577	0.912133	0.946647	-0.0345137				0		0		0		0		0		0		0		0		0
cg14278073	0.901046	0.935109	-0.0340625	NM_001371	DNAH8		0		0		0		0		1	NM_001206927	0		0		0		0
cg11115622	0.928669	0.962727	-0.0340576	NM_015549	PLEKHG3		0		0		0		0		0		0		0		0		0
cg07147709	0.896355	0.930166	-0.033811	NR_029606	MIR7-2		0		0		0		0		0		0		0		0		0
cg15663173	0.903246	0.936413	-0.0331668	NM_004422	DVL2		0		0		0		0		1	NM_004422	0		0		0		0
cg12841650	0.92807	0.961012	-0.032942				0		0		0		0		0		0		0		0		0
cg14485103	0.947146	0.979964	-0.0328175				0		0		0		0		0		0		0		0		0
cg10869879	0.925692	0.95835	-0.0326579	NM_001005915	ERBB3		0		0		0		0		0		0		0		2	NM_001005915;NM_001982	0
cg15833158	0.931958	0.96446	-0.0325017				0		0		0		0		0		0		0		0		0
cg14977279	0.910873	0.943163	-0.0322898	NM_002226	JAG2		0		0		0		0		2	NM_002226;NM_145159	0		0		0		0
cg18541042	0.908939	0.941169	-0.0322305	NM_015689	DENND2A		0		0		0		0		1	NM_015689	0		0		0		0
cg11685316	0.947245	0.979319	-0.0320736	NM_152599	MFSD6L		1	NM_152599	0		0		0		0		0		0		0		0
cg17565051	0.931182	0.962989	-0.0318074	NM_001003656	PPP2R2D		0		0		0		0		0		0		1	NR_033191	1	NM_018461	0
cg18179964	0.927122	0.958719	-0.0315969	NM_001120	MFSD10		0		0		0		0		0		0		0		2	NM_001120;NM_001146069	0
cg10782139	0.917564	0.948958	-0.0313946	NM_001029880	SFMBT2		0		0		0		0		0		0		0		2	NM_001018039;NM_001029880	0
cg01548142	0.935127	0.966426	-0.0312986				0		0		0		0		0		0		0		0		0
cg26403748	0.912686	0.943891	-0.0312047	NM_006035	CDC42BPB		0		0		0		0		0		0		0		1	NM_006035	0
cg22004693	0.930836	0.961861	-0.031025	NM_003439	ZKSCAN1		0		0		0		0		0		1	NM_003439	0		0		0
cg04517903	0.917237	0.94801	-0.0307731	NM_016111 **	TELO2		0		0		0		0		1	NM_016111	0		0		0		0
cg09570348	0.933266	0.963873	-0.0306071	NM_032098	PCDHGB4		0		2	NM_003736;NM_032098	0		0		0		0		0		10	NM_018912;NM_018915;NM_018916;NM_018917;NM_018918;NM_018919;NM_018920;NM_018922;NM_018923;NM_018924	0
cg20402783	0.930048	0.960619	-0.0305706	NM_017409	HOXC10		0		0		0		0		0		0		0		1	NM_017409	0
cg22561013	0.930013	0.960529	-0.0305158	NM_001025076	CUGBP2		0		0		0		0		0		0		0		4	NM_001025076;NM_001025077;NM_001083591;NM_006561	0
cg04618897	0.925783	0.95627	-0.0304873	NM_014855	KIAA0415		0		0		0		0		0		0		0		1	NM_014855	0
cg23352384	0.0260341	0.0563516	-0.0303174	NM_005494	DNAJB6		0		0		0		0		0		0		2	NM_005494;NM_058246	0		0
cg07374961	0.929369	0.9592	-0.0298307				0		0		0		0		0		0		0		0		0
cg05343808	0.909975	0.939607	-0.0296315	NM_001001555	GRB10		0		0		0		0		0		0		1	NM_001001555	0		0
cg13372862	0.948203	0.977742	-0.0295383	NM_001099281	HEATR7A		0		0		0		0		3	NM_001099280;NM_001099281;NM_032450	0		0		0		0
cg09731745	0.935078	0.964477	-0.029399	NM_005539 ****	INPP5A		0		0		0		0		0		0		0		1	NM_005539	0
cg05364747	0.938889	0.967872	-0.0289833	NM_052843	OBSCN		0		0		0		0		0		0		0		2	NM_001098623;NM_052843	0
cg13987792	0.924461	0.953318	-0.0288564				0		0		0		0		0		0		0		0		0
cg02953397	0.928575	0.957423	-0.0288481	NM_030649	ACAP3		0		0		0		0		0		0		0		1	NM_030649	0
cg27594157	0.936359	0.965194	-0.0288349	NM_152769	C19orf26		0		0		0		0		1	NM_152769	0		0		0		0
cg21097698	0.959378	0.988181	-0.0288032	NM_001130017	ART3		1	NM_001130017	0		0		0		0		0		0		0		0
cg09521703	0.95078	0.979575	-0.028795	NM_001145176	SHISA7		0		0		0		0		1	NM_001145176	0		0		0		0
cg23969005	0.924887	0.953585	-0.0286976				0		0		0		0		0		0		0		0		0
cg10505610	0.955738	0.984398	-0.0286598	NM_001017995	SH3PXD2B		0		0		0		0		0		0		0		1	NM_001017995	0
cg02075410	0.959929	0.988194	-0.0282644	NM_006726	LRBA		1	NM_006439	0		0		0		0		0		0		2	NM_001199282;NM_006726	0
cg23237611	0.926762	0.954807	-0.0280452	NM_002440	MSH4		0		1	NM_002440	0		0		0		0		0		0		0
cg16596103	0.947513	0.975535	-0.0280228	NM_019850	NGEF		0		0		0		0		0		0		0		2	NM_001114090;NM_019850	0
cg24986058	0.945044	0.972776	-0.0277316	NM_173701	WARS		0		0		0		0		0		0		0		4	NM_004184;NM_173701;NM_213645;NM_213646	0
cg12705352	0.935507	0.962958	-0.0274508				0		0		0		0		0		0		0		0		0
cg02198617	0.959388	0.986652	-0.0272643	NM_174891	C14orf79		0		0		0		0		0		0		0		0		0
cg19472956	0.948851	0.976104	-0.0272533	NM_005110	GFPT2		0		0		0		0		1	NM_005110	0		0		0		0
cg17743085	0.953263	0.980431	-0.0271683	NM_006532	ELL		0		0		0		0		1	NM_006532	0		0		0		0
cg27324804	0.945847	0.972431	-0.0265846	NM_181500 **	CUX1		0		0		0		0		0		0		0		7	NM_001202543;NM_001202544;NM_001202545;NM_001202546;NM_001913;NM_181500;NM_181552	0
cg01172114	0.947581	0.973952	-0.0263711	NM_178150	FBXO18		0		0		0		0		0		4	NM_001258452;NM_001258453;NM_032807;NM_178150	0		0		0
cg07797073	0.943839	0.969974	-0.0261348	NM_002744	PRKCZ		0		0		0		0		0		0		0		1	NM_002744	0
cg22697239	0.94602	0.972081	-0.0260612	NM_001024844	CD82		0		0		0		0		2	NM_001024844;NM_002231	0		0		0		0
cg14993530	0.0365984	0.0624881	-0.0258897	NM_004501	HNRNPU		0		2	NM_004501;NM_031844	0		0		0		0		0		0		0
cg22509816	0.926938	0.952798	-0.0258601	NM_001032998	KYNU		0		0		0		0		0		0		0		3	NM_001032998;NM_001199241;NM_003937	0
cg24990494	0.950517	0.975518	-0.0250005	NR_027062	EEF1DP3		0		0		0		0		0		0		1	NR_027062	0		0
cg01449677	0.951016	0.975827	-0.0248107	NM_025090	USP36		0		0		0		0		0		0		0		1	NM_025090	0
cg23218559	0.950663	0.975344	-0.0246805	NM_000479	AMH		0		0		0		0		1	NM_000479	0		0		0		0
cg23536372	0.95364	0.978282	-0.0246416	NM_004389	CTNNA2		0		0		0		0		2	NM_001164883;NM_004389	0		0		0		0
cg15804426	0.949279	0.973432	-0.0241528	NM_000540	RYR1		0		0		0		0		2	NM_000540;NM_001042723	0		0		0		0
cg07957471	0.948608	0.972708	-0.0241	NM_021226	ARHGAP22		0		0		0		0		4	NM_001256024;NM_001256025;NM_001256026;NM_021226	1	NR_045675	0		0		0
cg21241902	0.943624	0.967585	-0.0239613	NM_001130969	NELF		0		0		0		0		0		0		0		5	NM_001130969;NM_001130970;NM_001130971;NM_001178064;NM_015537	0
cg11991516	0.951839	0.975657	-0.0238178	NM_001113492	2013-09-09		0		0		0		0		0		0		1	NM_001113496	5	NM_001113491;NM_001113492;NM_001113493;NM_001113494;NM_006640	0
cg21393135	0.948558	0.972247	-0.0236896	NM_006295	VARS		0		0		0		0		1	NM_006295	0		0		0		0
cg17766055	0.937996	0.961316	-0.0233199	NM_003550 ***	MAD1L1		0		0		0		0		0		0		0		3	NM_001013836;NM_001013837;NM_003550	0
cg26894968	0.95065	0.973881	-0.0232316	NM_001328	CTBP1		0		0		0		0		2	NM_001012614;NM_001328	0		0		0		0
cg05194102	0.957609	0.979773	-0.0221643	NM_001130012	SLC9A3R2		0		0		0		0		0		5	NM_001130012;NM_001252073;NM_001252075;NM_001252076;NM_004785	0		0		0
cg15319528	0.957345	0.979169	-0.0218238	NM_005618	DLL1		0		0		0		0		1	NM_005618	0		0		0		0
cg10224088	0.932985	0.954698	-0.0217128	NM_005979	S100A13		0		0		0		0		0		0		0		5	NM_001024210;NM_001024211;NM_001024212;NM_001024213;NM_005979	0
cg11490865	0.951776	0.973252	-0.0214762	NM_145003	TSNARE1		0		0		0		0		1	NM_145003	0		0		0		0
cg08359464	0.0331882	0.0546431	-0.021455	NM_002950	RPN1		0		0		0		0		0		0		0		0		0
cg03633073	0.962979	0.984197	-0.0212179	NM_013275 **	ANKRD11		0		0		0		0		0		0		3	NM_001256182;NM_001256183;NM_013275	0		1	NR_045839
cg22454060	0.951478	0.972575	-0.0210975	NM_002691	POLD1		0		0		0		1	NR_046402	2	NM_001256849;NM_002691	0		0		0		0
cg04807512	0.944054	0.96505	-0.0209964	NM_016111 **	TELO2		0		0		0		0		1	NM_016111	0		0		0		0
cg16132555	0.957748	0.978692	-0.0209435				0		0		0		0		0		0		0		0		0
cg06978461	0.955833	0.976716	-0.0208835	NM_015027	PDXDC1		0		0		0		0		1	NM_015027	0		0		0		0
cg10137837	0.963888	0.984228	-0.0203392	NM_181844	BCL6B		0		0		0		0		0		0		1	NM_181844	0		0
cg25741487	0.953294	0.97339	-0.0200965				0		0		0		0		0		0		0		0		0
cg07966910	0.0294668	0.0495211	-0.0200543	NM_182828	GDF7		0		0		0		0		0		0		0		0		0
cg22714290	0.959219	0.979109	-0.01989	NR_026817	LOC148696		1	NR_026817	0		0		0		0		0		0		0		0
cg04808027	0.9547	0.974274	-0.0195739	NM_004292	RIN1		0		0		0		0		1	NM_004292	0		0		0		0
cg00542545	0.95231	0.97174	-0.01943	NM_152527	SLC16A14		0		0		0		0		1	NM_152527	0		0		0		0
cg00745731	0.955002	0.973692	-0.0186902	NM_005224 **	ARID3A		0		0		0		0		1	NM_005224	0		0		0		0
cg24393673	0.959364	0.977559	-0.0181954	NM_058170	OLFM3		0		0		0		0		0		0		0		1	NM_058170	0
cg15607387	0.967757	0.98575	-0.0179927				0		0		0		0		0		0		0		0		0
cg26650539	0.0271617	0.0450615	-0.0178997	NM_024294	C6orf106		0		0		0		0		0		0		0		0		0
cg15775406	0.959533	0.977422	-0.0178883				0		0		0		0		0		0		0		0		0
cg06763054	0.9517	0.969546	-0.017846	NM_004686 **	MTMR7		1	NM_004686	0		0		0		0		0		0		0		0
cg11173579	0.955774	0.973532	-0.0177577	NM_014586	HUNK		0		0		0		0		0		0		0		1	NM_014586	0
cg15875120	0.0265921	0.0443359	-0.0177438	NM_024948	FAM188A		0		0		0		0		0		0		0		0		0
cg16734433	0.963847	0.981211	-0.0173635				0		0		0		0		0		0		0		0		0
cg06571993	0.963636	0.980674	-0.0170382	NM_003496	TRRAP		0		0		0		0		2	NM_001244580;NM_003496	0		0		0		0
cg14210321	0.959384	0.976056	-0.0166717	NM_003581	NCK2		0		0		0		0		0		3	NM_001004720;NM_001004722;NM_003581	0		0		0
cg17147526	0.970928	0.986512	-0.0155845	NM_005541	INPP5D		0		0		0		0		2	NM_001017915;NM_005541	0		0		0		0
cg10485664	0.962695	0.977831	-0.0151362	NM_001160264	FEZF1		0		0		0		1	NR_036484	0		0		0		0		0
cg00575683	0.0255216	0.040605	-0.0150834	NM_181715	CRTC2		0		1	NM_181715	0		0		0		0		0		0		0
cg02602423	0.962829	0.977605	-0.0147762	NM_020725	ATXN7L1		0		0		0		0		2	NM_020725;NM_138495	0		0		0		0
cg07232648	0.0245675	0.0391203	-0.0145528	NM_016498	MTP18		2	NM_001003704;NM_016498	0		0		0		0		0		0		0		0
cg10967866	0.964086	0.978582	-0.0144959	NM_005539 ****	INPP5A		0		0		0		0		0		0		0		1	NM_005539	0
cg09744766	0.96853	0.982882	-0.0143521				0		0		0		0		0		0		0		0		0
cg06317056	0.0227859	0.0367988	-0.0140129	NM_000546	TP53		0		0		0		0		0		0		5	NM_000546;NM_001126112;NM_001126113;NM_001126114;NM_001126118	0		0
cg07088555	0.971101	0.98462	-0.0135192				0		0		0		0		0		0		0		0		0
cg02678084	0.0237415	0.0368373	-0.0130958	NM_013399	C16orf5		0		0		0		0		0		0		3	NM_001199055;NM_001199056;NM_013399	0		0
cg13082654	0.966595	0.979449	-0.0128541	NM_006031	PCNT		0		0		0		0		0		0		0		1	NM_006031	0
cg24803059	0.973017	0.98579	-0.0127733	NM_053005	HCCA2		0		0		0		0		0		0		0		1	NM_053005	0
cg04206484	0.965519	0.978201	-0.0126817	NM_001134395	C7orf50		0		0		0		0		0		0		0		3	NM_001134395;NM_001134396;NM_032350	0
cg16746737	0.0129222	0.0245942	-0.011672	NM_181893	UBE2D3		0		1	NM_001008388	0		0		0		0		0		0		0
cg01398327	0.015968	0.0275739	-0.0116059				0		0		0		0		0		0		0		0		0
cg18505593	0.974301	0.985599	-0.0112984	NM_001144995	CCDC85C		0		0		0		0		0		0		0		1	NM_001144995	0
cg12006733	0.976205	0.986573	-0.010368	NM_198525	KIF7		0		0		0		0		1	NM_198525	0		0		0		0
cg16534505	0.0166161	0.02607	-0.0094539	NM_015099	CAMTA2		0		0		0		0		0		0		1	NM_015099	1	NM_001171166	0
cg14237930	0.0141305	0.0225062	-0.0083757				0		0		0		0		0		0		0		0		0
cg03917623	0.0292135	0.0154815	0.013732	NM_002869	RAB6A		0		0		0		0		0		0		0		0		0
cg20690919	0.0252024	0.011354	0.0138484	NM_001017416	USP1		0		0		0		0		0		0		0		0		0
cg19132462	0.0441694	0.0243671	0.0198022	NM_001025389 **	AMPD3		0		0		0		0		0		0		1	NM_001172431	1	NM_000480	0
cg02770843	0.0470144	0.0245435	0.0224708				0		0		0		0		0		0		0		0		0
cg11191555	0.0669739	0.0401987	0.0267752	NM_173465 **	COL23A1		0		0		0		0		0		0		0		1	NM_173465	0
cg19601328	0.0768123	0.0500157	0.0267966	NM_003954	MAP3K14		0		0		0		0		0		0		1	NM_003954	0		0
cg01880540	0.0615101	0.033952	0.0275581	NM_014807	C2CD2L		0		0		0		0		0		0		0		0		0
cg18207999	0.0616522	0.0332971	0.0283551				0		0		0		0		0		16	NM_001257408;NM_001257409;NM_001257410;NM_001257411;NM_001257412;NM_001257413;NM_001257414;NM_012481;NM_183228;NM_183229;NM_183230;NM_183231;NM_183232;NR_047559;NR_047560;NR_047561	0		0		0
cg01407447	0.945405	0.916992	0.0284126				0		0		0		0		0		0		0		0		0
cg02910910	0.0827404	0.0538665	0.0288739	NM_032790	ORAI1		0		0		0		0		0		0		0		0		0
cg04917472	0.082214	0.0481681	0.0340459	NM_001336 **	CTSZ		0		0		0		0		0		0		0		0		0
cg10330169	0.944022	0.909526	0.0344962	NM_152383	DIS3L2		0		0		0		0		0		0		5	NM_001257281;NM_001257282;NM_152383;NR_046476;NR_046477	0		0
cg13333087	0.0978713	0.0626031	0.0352682	NM_016648	LARP7		1	NM_018392	0		0		0		0		0		0		0		0
cg25882830	0.0562953	0.0198413	0.036454	NM_020225	STOX2		0		0		0		0		0		0		0		0		0
cg09037630	0.082183	0.0445803	0.0376027				0		0		0		0		0		0		0		0		0
cg09113613	0.0834732	0.0454491	0.0380242	NM_020336	RALGAPB		0		0		0		0		0		0		1	NM_020336	0		0
cg10062193	0.0927657	0.0542519	0.0385139	NM_020453	ATP10D		0		0		0		0		0		0		0		1	NM_020453	0
cg16661744	0.0955067	0.0558878	0.0396189	NM_001100875	2013-03-10		0		0		0		0		0		0		1	NR_036146	2	NM_001100875;NM_152598	0
cg10174864	0.113774	0.0740881	0.039686	NM_018062	FANCL		0		0		0		0		0		0		0		0		0
cg01862311	0.103148	0.0626062	0.0405423				0		0		0		0		0		0		0		0		0
cg14531437	0.931539	0.890454	0.041085				0		0		0		0		0		0		0		0		0
cg02394249	0.911151	0.868291	0.0428594	NM_001004330	PLEKHG7		0		0		0		0		0		0		0		1	NM_001004330	0
cg11638399	0.123433	0.0804016	0.043031				0		0		0		0		0		0		0		0		0
cg17578639	0.111592	0.0684018	0.0431906	NM_024665	TBL1XR1		0		0		0		0		0		0		1	NM_024665	0		0
cg17584530	0.937093	0.893307	0.0437857				0		0		0		0		0		0		0		0		0
cg26950369	0.12052	0.0762754	0.0442451	NM_152381	XIRP2		0		0		0		0		0		0		0		3	NM_001079810;NM_001199143;NM_152381	0
cg16898425	0.112834	0.0675982	0.0452356	NM_001166435	ITIH1		0		0		0		0		0		0		0		2	NM_001166434;NM_002215	0
cg12313969	0.928605	0.883165	0.0454394	NM_133337 **	MYOF		0		0		0		0		0		0		0		2	NM_013451;NM_133337	0
cg20090162	0.11354	0.0672232	0.0463165	NM_020458	TTC7A		0		0		0		0		0		0		0		1	NM_020458	0
cg11094248	0.0991877	0.0524797	0.046708	NM_001145301	RARA		0		0		0		0		0		0		0		3	NM_000964;NM_001145301;NM_001145302	0
cg17935536	0.110367	0.0631267	0.04724	NM_022893	BCL11A		0		0		0		0		0		0		0		3	NM_018014;NM_022893;NM_138559	0
cg22193385	0.125882	0.0783935	0.047488	NM_005556	KRT7		0		0		0		0		0		0		0		1	NM_005556	0
cg25137372	0.098277	0.0494606	0.0488164	NM_002108	HAL		3	NM_001258333;NM_001258334;NM_002108	0		0		0		0		0		0		0		0
cg08293102	0.90876	0.859732	0.0490278	NM_001163940	PYGL		0		0		0		0		0		0		0		2	NM_001163940;NM_002863	0
cg00035969	0.120813	0.0710929	0.0497206				0		0		0		0		0		0		0		0		0
cg06208382	0.887788	0.837786	0.0500019	NM_020700	PPM1H		0		0		0		0		0		0		0		1	NM_020700	0
cg20728746	0.132262	0.0817354	0.0505266	NM_021088	ZNF2		0		0		0		0		0		0		0		0		0
cg01801643	0.894482	0.843347	0.0511346	NM_017719	SNRK		0		0		0		0		0		0		0		2	NM_001100594;NM_017719	0
cg19014335	0.114442	0.0632644	0.0511772	NM_198900	FMNL3		0		0		0		0		0		0		0		2	NM_175736;NM_198900	0
cg19037884	0.919566	0.867648	0.0519184				0		0		0		0		0		0		0		0		0
cg16577647	0.107336	0.0553411	0.0519946	NM_001007469	HCST		0		0		0		0		0		0		0		0		0
cg10097313	0.1023	0.0497365	0.0525632				0		0		0		0		0		0		0		0		0
cg11879354	0.111255	0.0586444	0.0526105	NM_001009991	SYTL3		0		0		0		0		0		0		4	NM_001009991;NM_001242384;NM_001242394;NM_001242395	0		0
cg24650915	0.908872	0.855219	0.0536535	NM_001037633	SIL1		0		0		0		0		0		0		0		2	NM_001037633;NM_022464	0
cg24381372	0.0999643	0.0451167	0.0548476	NM_001171110	FAM133A		4	NM_001171109;NM_001171110;NM_001171111;NM_173698	0		0		0		0		0		0		0		0
cg19867579	0.140288	0.0848865	0.0554014				0		0		0		0		0		0		0		0		0
cg22022821	0.0952199	0.0394073	0.0558125				0		0		0		0		0		0		0		0		0
cg17411016	0.144514	0.0870196	0.0574946				0		0		0		0		0		0		0		0		0
cg00516092	0.140885	0.0826254	0.0582597				0		0		0		0		0		0		1	NR_034152	0		0
cg27357229	0.151482	0.0931812	0.0583013	NM_002977	SCN9A		0		0		0		0		0		0		0		1	NM_002977	0
cg13681496	0.109119	0.0503726	0.0587468				0		0		0		0		0		0		0		0		0
cg05201300	0.113027	0.0538108	0.0592167	NM_003945	ATP6V0E1		0		0		0		0		0		0		0		1	NM_003945	0
cg05836943	0.146037	0.0857405	0.0602961	NM_173201 **	ATP2A1		0		0		0		0		0		0		0		0		0
cg13582028	0.933499	0.873007	0.0604921	NM_207332 **	ERICH1		0		0		0		0		0		0		0		1	NM_207332	0
cg15583492	0.189148	0.127061	0.0620875	NM_001098512	PRKG1		0		0		0		0		0		0		0		2	NM_001098512;NM_006258	0
cg20416222	0.139092	0.076086	0.0630065				0		0		0		0		0		0		0		0		0
cg05228359	0.142195	0.0781374	0.0640579				0		0		0		0		0		0		0		0		0
cg16551670	0.108322	0.0438954	0.0644268				0		0		0		0		0		0		0		0		0
cg23599820	0.120285	0.0558563	0.0644286	NM_014738	KIAA0195		0		0		0		0		0		0		1	NM_014738	0		0
cg14643264	0.876831	0.81165	0.0651814	NM_024761	MOBKL2B		0		0		0		0		0		0		0		1	NM_024761	0
cg24686551	0.179192	0.111814	0.067378				0		0		0		0		0		0		0		0		0
cg04156900	0.886325	0.817916	0.0684088	NM_002991 **	CCL24		0		0		0		0		0		0		0		0		0
cg19409687	0.878013	0.809582	0.0684316				0		0		0		0		0		0		0		0		0
cg17130457	0.139242	0.0707538	0.0684886				0		0		0		0		0		0		0		0		0
cg13594542	0.147475	0.0788364	0.0686388	NM_016172	UBAC1		0		0		0		0		0		0		0		1	NM_016172	0
cg21906947	0.886909	0.818259	0.0686501	NM_030615	KIF25		0		0		0		0		0		0		2	NM_005355;NM_030615	0		0
cg20595457	0.199443	0.130402	0.0690415	NM_182663	RASSF5		0		0		0		0		0		0		0		3	NM_182663;NM_182664;NM_182665	0
cg24562081	0.841194	0.770609	0.0705847				0		0		0		0		0		0		0		0		0
cg09654261	0.919266	0.847891	0.0713749				0		0		0		0		0		0		0		0		0
cg07250036	0.12069	0.0470241	0.0736657	NM_016396	CTDSPL2		0		0		0		0		0		0		1	NM_016396	0		0
cg16407699	0.891916	0.818129	0.0737864				0		0		0		0		0		0		0		0		0
cg14152974	0.869716	0.795818	0.0738982	NM_015599	PGM3		0		0		0		0		0		0		0		4	NM_001199917;NM_001199918;NM_001199919;NM_015599	0
cg17216385	0.881085	0.806815	0.0742696	NM_006642	SDCCAG8		0		0		0		0		0		0		0		1	NM_006642	0
cg23528791	0.157937	0.0834359	0.0745013	NM_173515	CNKSR3		0		0		0		0		0		0		0		1	NM_173515	0
cg20244073	0.186578	0.111742	0.0748363	NM_033290	MID1		0		0		0		0		0		0		1	NM_033290	0		0
cg04191342	0.20231	0.127215	0.0750946	NM_003716	CADPS		0		0		0		0		0		0		0		3	NM_003716;NM_183393;NM_183394	0
cg25856090	0.137979	0.0622093	0.0757693	NM_000083	CLCN1		0		0		0		1	NR_046453	1	NM_000083	0		0		0		0
cg01117339	0.152445	0.0760017	0.076443				0		0		0		0		0		0		0		0		0
cg08140459	0.159662	0.083161	0.0765009				0		0		0		0		0		0		0		0		0
cg12949547	0.865356	0.788522	0.0768338				0		0		0		0		0		0		0		0		0
cg03611265	0.850701	0.773313	0.0773879	NM_015987	HEBP1		0		0		0		0		0		0		1	NR_038920	1	NM_015987	0
cg08381046	0.90887	0.830338	0.0785321				0		0		0		0		0		0		0		0		0
cg23109530	0.156983	0.0779264	0.0790562				0		0		0		0		0		0		0		0		0
cg01347048	0.877646	0.797349	0.0802965	NM_016169	SUFU		0		0		0		0		0		0		0		1	NM_016169	0
cg01668352	0.832618	0.751924	0.0806937	NM_020762	SRGAP1		0		0		0		0		0		0		0		1	NM_020762	0
cg00561739	0.89949	0.8187	0.0807896	NM_004553	NDUFS6		0		0		0		0		0		0		0		1	NM_004553	0
cg00328720	0.174273	0.0929234	0.0813496	NM_001440	EXTL3		0		0		0		0		0		0		1	NM_001440	0		0
cg14953379	0.865478	0.783786	0.081692	NM_018238	AGK		0		0		0		0		0		0		0		1	NM_018238	0
cg02767093	0.832027	0.750096	0.081931	NM_003576	STK24		0		0		0		0		0		0		0		2	NM_001032296;NM_003576	0
cg08996506	0.790738	0.708084	0.0826535	NM_019862	ABCC1		0		0		0		0		0		0		0		1	NM_004996	0
cg10548978	0.862655	0.779354	0.0833017	NM_152710	C10orf27		1	NM_152710	0		0		0		0		0		0		0		0
cg09539496	0.189489	0.105801	0.083688				0		0		0		0		0		0		0		0		0
cg00474713	0.809328	0.725282	0.0840463	NM_173201 **	ATP2A1		0		0		0		0		0		0		0		0		0
cg22997362	0.3034	0.219312	0.0840881				0		0		0		0		0		0		0		0		0
cg15871206	0.936719	0.852511	0.0842088	NM_194312	ESPNL		0		1	NM_194312	0		0		0		0		0		0		0
cg11954355	0.210935	0.126655	0.0842801	NR_030580	MIR298		0		0		0		0		0		0		0		0		0
cg22260869	0.190215	0.105926	0.0842885	NM_001145044	SLCO3A1		0		0		0		0		0		0		0		2	NM_001145044;NM_013272	0
cg00901878	0.869337	0.78431	0.0850272				0		0		0		0		0		0		0		0		0
cg13783786	0.804761	0.718491	0.08627	NM_001037293	PALM2		0		0		0		0		0		0		0		4	NM_001037293;NM_007203;NM_053016;NM_147150	0
cg12048965	0.900816	0.813687	0.087129				0		0		0		0		0		0		0		0		0
cg17407166	0.223099	0.135317	0.087782				0		0		0		0		0		0		0		0		0
cg04193065	0.1551	0.0662908	0.0888088				0		0		0		0		0		0		0		0		0
cg16908740	0.886479	0.797441	0.0890379				0		0		0		0		0		0		0		0		0
cg01878963	0.822959	0.733085	0.0898733				0		0		0		0		0		0		0		0		1	NR_034126
cg20817661	0.191719	0.100698	0.0910213	NM_000129	F13A1		0		0		0		0		0		0		0		0		0
cg22699620	0.175819	0.084697	0.0911221	NM_001127491	ITGB2		1	NM_001127491	0		0		6	NR_038311;NR_038312;NR_038313;NR_038314;NR_038315;NR_038316	0		0		0		0		0
cg07659624	0.258924	0.167698	0.0912268	NM_016612	SLC25A37		0		0		0		0		0		0		0		1	NM_016612	0
cg08350549	0.716238	0.624722	0.0915154	NM_032359	C3orf26		0		0		0		0		0		0		1	NM_014890	3	NM_001042459;NM_032359;NM_182909	1	NR_031662
cg20018396	0.204681	0.112902	0.0917791				0		0		0		0		0		0		0		0		0
cg06947286	0.791099	0.69838	0.092719	NM_003687	PDLIM4		0		0		0		0		0		0		0		2	NM_001131027;NM_003687	0
cg09244071	0.739243	0.645882	0.0933613	NM_181500 **	CUX1		0		0		0		0		0		0		0		7	NM_001202543;NM_001202544;NM_001202545;NM_001202546;NM_001913;NM_181500;NM_181552	0
cg09660810	0.759128	0.66525	0.0938783	NM_004592	SFRS8		0		0		0		0		0		0		0		2	NM_001261411;NM_004592	0
cg24686918	0.157615	0.0636859	0.0939286				0		0		0		0		0		0		0		0		0
cg19312404	0.900536	0.806136	0.0944001	NM_001031701	NT5DC3		0		0		0		0		0		0		0		1	NM_001031701	0
cg06122613	0.813737	0.719065	0.0946713	NM_002651	PI4KB		0		0		0		0		0		0		3	NM_001198773;NM_001198774;NM_001198775	1	NM_002651	0
cg07011538	0.299344	0.203333	0.0960117				0		0		0		0		0		0		0		0		0
cg24718015	0.754586	0.658439	0.0961465	NM_213662	STAT3		0		0		0		0		0		0		0		3	NM_003150;NM_139276;NM_213662	0
cg19160629	0.244916	0.147553	0.0973628	NM_025164	SIK3		0		0		0		0		0		0		0		1	NM_025164	0
cg01354782	0.800511	0.702992	0.0975188	NM_002223 **	ITPR2		0		0		0		0		0		0		0		1	NM_002223	0
cg27220117	0.238324	0.140433	0.0978906	NM_133337 **	MYOF		0		0		0		0		0		0		0		2	NM_013451;NM_133337	0
cg09179691	0.802626	0.704445	0.0981809	NM_183006	DLGAP4		0		0		0		0		0		0		1	NM_001042486	2	NM_014902;NM_183006	0
cg20981184	0.699036	0.600228	0.098808				0		0		0		0		0		0		0		0		0
cg00781658	0.818487	0.71872	0.0997676	NM_007040	HNRNPUL1		0		0		0		0		0		0		0		2	NM_007040;NM_144732	0
cg08454015	0.65275	0.552955	0.0997948				0		0		0		0		0		0		0		0		0
cg08986840	0.266452	0.166435	0.100017				0		0		0		0		0		0		0		0		0
cg18599081	0.244307	0.143234	0.101072	NM_001130910	CCRL2		0		0		0		0		0		0		0		0		0
cg01905967	0.285918	0.184082	0.101836				0		0		0		0		0		0		0		0		0
cg11858226	0.312448	0.209986	0.102461				0		0		0		0		0		0		0		0		0
ch.16.62634859F	0.214363	0.110754	0.10361				0		0		0		0		0		0		0		0		0
cg10439737	0.816026	0.712219	0.103806	NM_198697	KRTAP12-3		0		0		0		0		0		0		0		1	NM_144991	0
cg07646791	0.168337	0.0639334	0.104403				0		0		0		0		0		0		0		0		0
cg19319037	0.338317	0.233507	0.10481	NM_003594	TTF2		0		0		0		0		0		0		0		1	NM_003594	0
cg07736627	0.778502	0.673606	0.104896	NM_021926	ALX4		0		0		0		0		0		0		0		1	NM_021926	0
cg03873049	0.379753	0.274559	0.105194	NM_015981	CAMK2A		0		0		0		0		0		0		0		2	NM_015981;NM_171825	0
cg17545652	0.735735	0.629592	0.106143	NM_004566	PFKFB3		0		0		0		0		0		0		0		2	NM_001145443;NM_004566	0
cg18865207	0.44512	0.338818	0.106302	NM_001033667	LY9		4	NM_001033667;NM_001261456;NM_001261457;NM_002348	0		0		0		0		0		0		0		0
cg11938951	0.279433	0.172952	0.10648	NR_002936	LOC222699		0		0		0		0		0		0		0		0		0
cg09907068	0.810099	0.703438	0.10666	NM_020760	HECW2		0		0		0		0		0		0		0		1	NM_020760	0
cg00435173	0.888673	0.781908	0.106765	NM_201434	RAB5C		0		0		0		0		0		0		3	NM_001252039;NM_004583;NM_201434	0		0
cg10126459	0.317884	0.210934	0.10695	NM_030806	C1orf21		0		0		0		0		0		0		0		0		0
cg25148758	0.265439	0.158243	0.107195				0		0		0		0		0		0		0		0		0
cg15859496	0.829956	0.72273	0.107226	NM_018639	WSB2		0		0		0		0		1	NM_018639	0		0		0		0
cg12377816	0.377772	0.269225	0.108547				0		0		0		0		0		0		0		0		0
cg14446942	0.26921	0.160484	0.108726	NM_002211	ITGB1		0		0		0		0		0		0		0		0		0
cg08639279	0.655357	0.545578	0.109779				0		0		0		0		0		0		0		0		0
cg24674269	0.279138	0.169149	0.109989				0		0		0		0		0		0		0		0		0
cg26914296	0.858488	0.748134	0.110354	NM_152635	OIT3		0		0		0		0		1	NM_152635	0		0		0		0
cg10649130	0.337163	0.226456	0.110707				0		0		0		0		0		0		0		0		0
cg01451604	0.899333	0.788526	0.110807				0		0		0		0		0		0		0		0		0
cg05132782	0.302248	0.191259	0.110989				0		0		0		0		0		0		0		0		0
cg13354934	0.634961	0.522416	0.112546				0		0		0		0		0		0		0		0		0
cg00945409	0.720639	0.608065	0.112575	NR_024431 **	LOC283050		0		0		0		0		0		0		0		0		3	NR_015429;NR_024429;NR_024431
cg02452500	0.409002	0.294901	0.114101				0		0		0		0		0		0		0		0		0
cg16137928	0.253611	0.139294	0.114316				0		0		0		0		0		0		0		0		0
cg10037049	0.617133	0.502453	0.11468	NM_000376	VDR		0		0		0		0		0		0		2	NM_000376;NM_001017535	1	NM_001017536	0
cg26684776	0.251756	0.136847	0.114909	NM_021244	RRAGD		0		0		0		0		0		0		0		1	NM_021244	0
cg03290131	0.524214	0.40887	0.115344	NM_004419	DUSP5		0		0		0		0		0		0		0		1	NM_004419	0
cg14512326	0.777183	0.661534	0.115649	NM_001001551	C9orf103		0		0		0		0		0		0		3	NM_001256915;NR_046421;NR_046422	1	NM_001001551	0
cg26656658	0.640532	0.524539	0.115994	NM_002562	P2RX7		0		0		0		5	NR_033948;NR_033950;NR_033951;NR_033952;NR_033953	0		0		4	NR_033949;NR_033954;NR_033955;NR_033956	1	NM_002562	0
cg15134583	0.343474	0.22643	0.117044	NM_001031685	TP53BP2		0		0		0		0		0		0		1	NM_005426	1	NM_001031685	0
cg24906819	0.203762	0.086206	0.117556	NM_001080826	PRAGMIN		0		0		0		0		0		0		0		1	NM_001080826	0
cg18944752	0.247002	0.129381	0.117621	NM_198229	RGS12		0		0		0		0		0		0		0		3	NM_002926;NM_198227;NM_198229	0
cg20542822	0.3535	0.235801	0.117699	NR_022012	COL29A1		0		0		0		1	NR_022012	1	NM_153264	0		0		0		0
cg09924241	0.930811	0.812773	0.118038	NM_213619	ATP6V1H		0		0		0		0		0		0		0		3	NM_015941;NM_213619;NM_213620	0
cg11321083	0.392961	0.273989	0.118972	NM_006795	EHD1		0		0		0		0		0		0		0		1	NM_006795	0
cg27050612	0.412908	0.293809	0.119099	NM_003204	NFE2L1		0		0		0		0		0		0		0		1	NM_003204	0
cg05591270	0.819427	0.699395	0.120033	NR_024431 **	LOC283050		0		0		0		0		0		0		0		0		3	NR_015429;NR_024429;NR_024431
cg18010131	0.671423	0.550926	0.120497	NM_001025389 **	AMPD3		0		0		0		0		0		0		1	NM_001172431	1	NM_000480	0
cg20662334	0.305456	0.184923	0.120534	NM_032427	MAML2		0		0		0		0		0		0		0		0		0
cg03997145	0.705095	0.584375	0.12072				0		0		0		0		0		0		0		0		0
cg16066219	0.734903	0.612816	0.122087	NM_016234	ACSL5		1	NM_203380	0		0		0		0		0		1	NM_203379	0		0
cg16098545	0.70534	0.582641	0.1227	NM_002223 **	ITPR2		0		0		0		0		0		1	NM_002223	0		0		0
cg12581229	0.374402	0.251529	0.122873	NM_024620	ZNF329		0		0		0		0		0		0		1	NM_024620	0		0
cg07310500	0.453451	0.330483	0.122968				0		0		0		0		0		0		0		0		0
cg19356022	0.704057	0.580906	0.123152	NM_003029	SHC1		0		0		0		0		0		0		3	NM_001130041;NM_001202859;NM_003029	0		0
cg14302612	0.813084	0.689468	0.123616	NM_001080527	MYO7B		0		0		0		0		0		0		1	NM_001080527	0		0
cg19774788	0.245714	0.122066	0.123647	NM_015426	WDR51A		0		0		0		0		0		0		0		3	NM_001161580;NM_001161581;NM_015426	0
cg27621721	0.819017	0.694787	0.12423				0		0		0		0		0		0		0		0		0
cg16925459	0.629672	0.50401	0.125662	NM_178425	HDAC9		0		0		0		0		0		0		0		7	NM_001204144;NM_001204145;NM_001204146;NM_014707;NM_058176;NM_178423;NM_178425	0
cg17758048	0.592773	0.467033	0.12574	NM_001161353	KCNMA1		0		0		0		0		0		0		0		4	NM_001014797;NM_001161352;NM_001161353;NM_002247	0
cg06935608	0.341403	0.215491	0.125913				0		0		0		0		0		0		0		0		0
cg26639552	0.27755	0.151635	0.125915				0		0		0		0		0		0		0		0		0
cg22137471	0.695078	0.569094	0.125984				0		0		0		0		0		0		0		0		0
cg11958234	0.376799	0.25047	0.126328				0		0		0		0		0		0		0		0		0
cg00975624	0.4123	0.285661	0.126639				0		0		0		0		0		0		0		0		0
cg13557213	0.331034	0.204052	0.126982				0		0		0		0		0		0		0		0		0
cg07588216	0.747215	0.618963	0.128252	NM_001114089	ENTPD6		0		0		0		0		0		0		0		2	NM_001114089;NM_001247	0
cg02196256	0.667687	0.539104	0.128583				0		0		0		0		0		0		0		0		0
cg07745671	0.677852	0.549215	0.128637				0		0		0		0		0		0		1	NR_047568	0		0
cg00530805	0.824664	0.695685	0.128979	NM_181442	ADNP		0		0		0		0		0		0		2	NM_015339;NM_181442	0		0
cg15696506	0.778155	0.649036	0.129119	NM_001553	IGFBP7		0		0		0		0		0		0		0		2	NM_001253835;NM_001553	0
cg02043679	0.546004	0.416652	0.129353	NM_019055	ROBO4		0		0		0		0		0		0		0		0		0
cg21946631	0.477899	0.348273	0.129626				0		0		0		0		0		0		0		0		0
cg27658026	0.284793	0.15508	0.129713	NM_001129742	CALHM3		0		0		0		0		0		0		0		0		0
cg14257435	0.52194	0.391852	0.130089				0		0		0		0		0		0		0		0		0
cg15626285	0.80843	0.678304	0.130126	NM_001734	C1S		0		0		0		0		0		0		0		0		0
cg04540882	0.236831	0.105898	0.130933				0		0		0		0		0		0		0		0		0
cg02932854	0.560505	0.429499	0.131006	NM_002991 **	CCL24		0		0		0		0		0		0		0		0		0
cg25758828	0.79864	0.667329	0.131311	NM_013953	PAX8		0		0		0		0		1	NM_003466	3	NM_013952;NM_013953;NM_013992	0		0		0
cg21880476	0.354175	0.222858	0.131317				0		0		0		0		0		0		0		0		0
cg24859433	0.683302	0.55179	0.131511				0		0		0		0		0		0		0		0		0
cg23981702	0.634955	0.502877	0.132078				0		0		0		0		0		0		0		0		0
cg15358855	0.411003	0.277294	0.133709	NM_199437	PRDM10		0		0		0		0		0		0		0		2	NM_020228;NM_199437	0
cg03310518	0.441144	0.306976	0.134168	NM_198098	AQP1		0		0		0		0		0		0		0		1	NM_198098	0
cg22534374	0.385228	0.250887	0.134341				0		0		0		0		0		0		0		0		0
cg16395432	0.521864	0.387454	0.13441	NR_031740 ***	MIR1976		0		0		0		0		0		0		0		2	NM_001006665;NM_002953	0
cg20168495	0.772525	0.638032	0.134493				0		0		0		0		0		0		0		0		0
cg18112681	0.705991	0.571418	0.134572	NM_004585	RARRES3		0		0		0		0		0		0		0		0		2	NR_037451;NR_049833
cg15342087	0.646926	0.51176	0.135166				0		0		0		0		0		0		0		0		0
cg18372930	0.633345	0.49796	0.135386				0		0		0		0		0		0		0		0		0
cg10336193	0.768918	0.633203	0.135715				0		0		0		0		0		0		0		0		0
cg04003357	0.423207	0.286669	0.136538				0		0		0		0		0		0		0		0		0
cg26673980	0.394855	0.257214	0.137642	NM_001040633	PRKAG2		0		0		0		0		0		0		1	NM_001040633	1	NM_016203	0
cg04217515	0.826582	0.688001	0.138581	NM_000211	ITGB2		0		0		0		0		0		0		0		2	NM_000211;NM_001127491	0
cg20433386	0.557013	0.417826	0.139187	NM_198384	CACNA1G		0		0		0		0		0		0		5	NR_046054;NR_046055;NR_046056;NR_046057;NR_046058	28	NM_001256324;NM_001256325;NM_001256326;NM_001256327;NM_001256328;NM_001256329;NM_001256330;NM_001256331;NM_001256332;NM_001256333;NM_001256334;NM_001256359;NM_001256360;NM_001256361;NM_018896;NM_198376;NM_198377;NM_198378;NM_198379;NM_198380;NM_198382;NM_198383;NM_198384;NM_198385;NM_198386;NM_198387;NM_198388;NM_198396	0
cg09100343	0.386638	0.245738	0.1409	NM_152727	CPNE2		0		0		0		0		1	NM_152727	0		0		0		0
cg24468934	0.688706	0.5477	0.141006	NR_031740 ***	MIR1976		0		0		0		0		0		0		0		2	NM_001006665;NM_002953	0
cg05242190	0.662432	0.521122	0.14131				0		0		0		0		0		0		0		0		0
cg19284751	0.302003	0.15989	0.142114	NM_006770	MARCO		1	NM_006770	0		0		0		0		0		0		0		0
cg02736746	0.565917	0.423617	0.142301	NM_025179	PLXNA2		0		0		0		0		0		0		0		1	NM_025179	0
cg12123879	0.281999	0.139571	0.142428	NR_027043	NCR1		0		0		0		0		0		0		0		0		0
cg02041484	0.87032	0.727397	0.142923	NM_005011	NRF1		0		0		0		0		0		0		1	NM_005011	0		0
cg05869537	0.468816	0.325488	0.143328	NM_213602	SIGLEC15		1	NM_213602	0		0		0		0		0		0		0		0
cg11033588	0.353934	0.210524	0.14341				0		0		0		0		0		0		0		0		0
cg26700919	0.753001	0.60907	0.14393	NM_181482	C18orf1		0		0		0		0		0		0		2	NM_181481;NM_181482	0		0
cg09776041	0.550565	0.4063	0.144265	NM_018161	NADSYN1		0		0		0		0		0		0		0		1	NM_018161	0
cg19543867	0.684342	0.539956	0.144386	NM_001134468	C7orf53		0		0		0		0		2	NM_001134468;NM_182597	0		0		0		0
cg01127300	0.481165	0.336523	0.144641				0		0		0		0		0		0		0		0		0
cg16540590	0.76326	0.618324	0.144936				0		0		0		0		0		0		0		0		0
cg20476019	0.800412	0.655431	0.144981	NM_133633	SYN3		0		0		0		0		0		0		0		3	NM_001135774;NM_003490;NM_133633	0
cg24996979	0.525076	0.379944	0.145133	NM_001043318	C14orf43		0		0		0		0		0		0		2	NM_001043318;NM_194278	0		0
cg02104162	0.65544	0.510195	0.145244				0		0		0		0		0		0		0		0		0
cg17854066	0.407221	0.261563	0.145658	NM_000222	KIT		0		0		0		0		0		0		0		2	NM_000222;NM_001093772	0
cg06876053	0.270967	0.125289	0.145677	NM_030962	SBF2		0		0		0		0		0		0		1	NR_036485	1	NM_030962	0
cg12719233	0.681397	0.535425	0.145972				0		0		0		0		0		0		0		0		0
cg10502118	0.242512	0.0958914	0.146621	NM_015150 **	RFTN1		0		0		0		0		0		0		1	NM_015150	0		0
cg10667102	0.615631	0.466886	0.148745				0		0		0		0		0		0		0		0		0
cg10881749	0.337989	0.188882	0.149107				0		0		0		0		0		0		0		0		0
cg24425149	0.379471	0.230315	0.149156	NM_014832	TBC1D4		0		0		0		0		0		0		0		1	NM_014832	0
cg00539174	0.498164	0.348295	0.149869	NM_001336 **	CTSZ		0		0		0		0		0		0		0		0		0
cg07062336	0.417168	0.267119	0.150049				0		0		0		0		0		0		0		0		0
cg05720511	0.683333	0.532576	0.150758	NM_181794	PKIB		0		0		0		0		0		0		0		6	NM_001270393;NM_001270394;NM_001270395;NM_032471;NM_181794;NM_181795	0
cg10129391	0.627761	0.476848	0.150914				0		0		0		0		0		0		0		0		0
cg00359365	0.451559	0.299808	0.151751	NR_031740 ***	MIR1976		0		0		0		0		0		0		0		2	NM_001006665;NM_002953	0
cg00871980	0.461999	0.309945	0.152054	NM_002213	ITGB5		0		0		0		0		0		0		0		1	NM_002213	0
cg10993086	0.613278	0.460621	0.152657				0		0		0		0		0		0		0		0		0
cg27052073	0.75935	0.606361	0.152989	NM_198478	NKPD1		0		0		0		0		0		1	NM_198478	0		0		0
cg14714222	0.398976	0.245884	0.153093	NM_020820	PREX1		0		0		0		0		0		0		0		1	NM_020820	0
cg25311470	0.468895	0.315609	0.153286	NM_001037132	NRCAM		0		0		0		0		0		0		4	NM_001193582;NM_001193583;NM_001193584;NM_005010	0		0
cg14833933	0.5441	0.390724	0.153376	NM_173087	CAPN3		0		3	NM_000070;NM_024344;NM_173087	0		0		0		0		0		0		0
cg05931231	0.511985	0.358486	0.153498				0		0		0		0		0		0		0		0		0
cg14789529	0.526707	0.373177	0.15353	NM_000572	IL10		0		0		0		0		0		1	NM_000572	0		0		0
cg09122593	0.393834	0.239939	0.153895	NM_015053	PPFIA4		0		0		0		0		0		0		0		0		0
cg07755264	0.286186	0.131844	0.154342				0		0		0		0		0		0		0		0		0
cg09680007	0.583072	0.428337	0.154735	NM_002960	S100A3		0		0		0		0		0		0		0		0		0
cg02387843	0.73351	0.578703	0.154807	NM_020041	SLC2A9		0		0		0		0		0		0		0		2	NM_001001290;NM_020041	0
cg16692277	0.491291	0.335761	0.15553	NR_003923	GUCY1B2		0		0		0		0		0		0		0		0		0
cg06480353	0.680989	0.525432	0.155557				0		0		0		0		0		0		0		0		0
cg26185620	0.379664	0.223989	0.155675				0		0		0		0		0		0		0		0		0
cg16704703	0.658504	0.502739	0.155765				0		0		0		0		0		0		0		0		0
cg00259834	0.237213	0.0795195	0.157693	NM_015150 **	RFTN1		0		0		0		0		0		0		1	NM_015150	0		0
cg07373723	0.737021	0.579005	0.158015	NM_032549	IMMP2L		0		0		0		0		0		0		0		2	NM_001244606;NM_032549	0
cg26811313	0.470141	0.310339	0.159802	NM_003550 ***	MAD1L1		0		0		0		0		0		0		0		3	NM_001013836;NM_001013837;NM_003550	0
cg23966363	0.329148	0.168717	0.160431	NM_005224 **	ARID3A		0		0		0		0		0		0		0		1	NM_005224	0
cg19260606	0.686779	0.525667	0.161111	NM_201628	KIAA1026		0		0		0		0		0		0		0		2	NM_015209;NM_201628	0
cg01446731	0.708205	0.545915	0.16229	NM_014862	ARNT2		0		0		0		0		0		0		0		1	NM_014862	0
cg03875678	0.413771	0.248884	0.164887	NM_004131	GZMB		0		0		0		0		0		0		0		0		0
cg19227523	0.503077	0.337984	0.165093	NM_003399	XPNPEP2		0		0		0		0		0		0		0		0		0
cg06038342	0.671016	0.505044	0.165972	NM_007368 **	RASA3		0		0		0		0		0		0		0		1	NM_007368	0
cg25857695	0.391869	0.225628	0.166241				0		0		0		0		0		0		0		0		0
ch.11.29638519R	0.270095	0.102817	0.167278				0		0		0		0		0		0		0		0		0
cg17083575	0.265931	0.0979142	0.168017	NM_001037165	FOXK1		0		0		0		0		0		0		0		1	NM_001037165	0
cg06547034	0.441326	0.272793	0.168533	NM_017551	GRID1		0		0		0		0		0		0		0		1	NM_017551	0
cg19911116	0.455883	0.286831	0.169052	NM_018234	STEAP3		0		0		0		0		0		0		0		3	NM_001008410;NM_018234;NM_182915	0
cg08575688	0.550884	0.380849	0.170036	NM_001130046	CCL20		0		0		0		0		0		0		0		0		0
cg12081645	0.484828	0.313407	0.171421				0		0		0		0		0		0		0		0		0
cg07436701	0.6333	0.461173	0.172127	NM_024756	MMRN2		0		0		0		0		0		0		0		0		0
cg08698943	0.742348	0.568974	0.173374				0		0		0		0		0		0		0		0		0
cg17742559	0.577635	0.403971	0.173664	NM_178170	NEK8		0		0		0		0		1	NM_178170	0		0		0		0
cg27295716	0.356041	0.181973	0.174069	NM_019086	VSIG10		0		0		0		0		0		0		0		0		0
cg05820435	0.534795	0.359584	0.175212	NM_004930	CAPZB		0		0		0		0		0		0		0		2	NM_001206540;NM_004930	1	NR_038125
cg23987198	0.65945	0.483959	0.175491				0		0		0		0		0		0		0		0		0
cg23902076	0.781602	0.606051	0.175551	NM_001135191 **	ASAP2		0		0		0		0		0		0		0		2	NM_001135191;NM_003887	0
cg09670263	0.761831	0.585839	0.175992	NM_024512	LRRC2		0		0		0		0		0		1	NM_024512	0		0		0
cg08067983	0.792278	0.615463	0.176815	NM_017664	ANKRD10		0		0		0		0		0		0		0		1	NM_017664	0
cg07842521	0.351691	0.174617	0.177074				0		0		0		0		0		0		0		0		0
cg00665650	0.269267	0.0906066	0.178661	NM_001033112	PAIP2		0		0		0		0		0		0		0		0		0
cg06484100	0.565423	0.386065	0.179358				0		0		0		0		0		0		0		0		0
cg13191951	0.762945	0.582865	0.180081	NM_024817	THSD4		0		0		0		0		0		0		0		1	NM_024817	0
cg19083497	0.469972	0.289496	0.180476	NM_207317	ZNF474		0		0		0		0		0		0		0		0		0
cg07520810	0.40701	0.226146	0.180864	NM_032199 **	ARID5B		1	NM_001244638	0		0		0		0		0		0		1	NM_032199	0
cg06164260	0.505478	0.324592	0.180886	NM_001706	BCL6		0		0		0		0		0		0		1	NM_001706	0		0
cg09169117	0.559408	0.378473	0.180935	NM_052905	FMNL2		0		0		0		0		0		0		0		1	NM_052905	0
cg15141853	0.646747	0.46402	0.182727				0		0		0		0		0		0		0		0		0
cg01267797	0.782692	0.599341	0.183351	NM_178276	SERINC5		0		0		0		0		0		0		0		3	NM_001174071;NM_001174072;NM_178276	0
cg01872593	0.686149	0.502523	0.183626				0		0		0		0		0		0		0		0		0
cg21646032	0.345848	0.162038	0.18381	NM_016152	RARB		0		0		0		0		0		0		0		2	NM_000965;NM_016152	0
cg04057599	0.529534	0.345675	0.183859				0		0		0		0		0		0		0		0		0
cg23903301	0.493941	0.309766	0.184175	NM_001127227	CD59		0		0		0		0		0		0		5	NM_000611;NM_001127227;NM_203329;NM_203330;NM_203331	0		0
cg12724221	0.401806	0.216797	0.185009	NM_021732	AVPI1		0		0		0		0		0		0		0		0		0
cg02069592	0.715475	0.529873	0.185602				0		0		0		0		0		0		0		0		0
cg03875819	0.533421	0.34734	0.186081				0		0		0		0		0		0		0		0		0
cg11737318	0.652661	0.465788	0.186873				0		0		0		0		0		0		2	NM_001247996;NM_018482	0		0
cg07468710	0.728218	0.539884	0.188334	NM_052876	NACC1		0		0		0		0		0		0		1	NM_052876	0		0
cg09324018	0.535063	0.345148	0.189915	NM_030797	FAM49A		0		0		0		0		0		0		1	NM_030797	0		0
cg11845168	0.386075	0.19565	0.190424	NM_022459	XPO4		0		0		0		0		0		0		0		1	NM_022459	0
cg00207226	0.652239	0.460898	0.191342	NM_001164478	FLJ44606		0		0		0		0		0		0		2	NM_001164478;NM_001164479	0		0
cg14014590	0.694177	0.502102	0.192075	NM_004560	ROR2		0		0		0		0		0		0		0		1	NM_004560	0
cg09244312	0.540074	0.347776	0.192298				0		0		0		0		0		0		0		0		0
cg03224812	0.50961	0.316969	0.192641	NM_001144959	EFCAB4B		0		0		0		0		0		0		2	NM_001144958;NM_032680	0		0
cg16389209	0.53204	0.339362	0.192678	NM_032199 **	ARID5B		1	NM_001244638	0		0		0		0		0		0		1	NM_032199	0
cg14599823	0.425009	0.231752	0.193258				0		0		0		0		0		0		0		0		0
cg22110158	0.507219	0.311518	0.195701	NM_021978	ST14		0		0		0		0		0		0		0		1	NM_021978	0
cg09477895	0.618438	0.420115	0.198322				0		0		0		0		0		0		0		1	NM_001257177	0
cg21670717	0.535326	0.332997	0.202329				0		0		0		0		0		0		0		0		0
cg02235918	0.605023	0.402586	0.202437				0		0		0		0		0		0		0		0		0
cg11444072	0.78521	0.581021	0.20419	NM_001135191 **	ASAP2		0		0		0		0		0		0		0		2	NM_001135191;NM_003887	0
cg08035694	0.703194	0.497882	0.205312				0		0		0		0		0		0		0		0		0
cg18527651	0.32291	0.115939	0.206971	NM_001570	IRAK2		0		0		0		0		0		1	NM_001570	0		0		0
cg21211645	0.612331	0.403464	0.208867	NM_015340	LARS2		0		0		0		0		0		1	NM_015340	0		0		0
cg25101764	0.438463	0.228213	0.21025				0		0		0		0		0		0		0		0		0
cg26280911	0.421635	0.209673	0.211962	NM_015288	PHF15		0		0		0		0		0		0		0		1	NM_015288	0
cg00502926	0.445376	0.233243	0.212133	NM_032572	RNASE7		0		0		0		0		0		0		0		0		0
cg26055899	0.426198	0.21284	0.213359	NM_015196	KIAA0922		0		0		0		0		0		0		0		2	NM_001131007;NM_015196	0
cg14114546	0.492328	0.276021	0.216307	NM_005779	LHFPL2		0		0		0		0		0		0		1	NM_005779	0		0
cg12081267	0.49559	0.277745	0.217845	NM_015348	TMEM131		0		0		0		0		0		0		0		1	NM_015348	0
cg17692230	0.535554	0.316967	0.218588				0		0		0		0		0		0		0		0		0
cg20300541	0.624683	0.400637	0.224046				0		0		0		0		0		0		0		0		0
cg02860705	0.437149	0.212107	0.225042				0		0		0		0		0		0		0		0		0
cg00006090	0.53523	0.307147	0.228083	NM_031293	PMFBP1		0		0		0		0		0		0		0		0		0
cg24475517	0.721447	0.49196	0.229487	NM_019044	CCDC93		0		0		0		0		0		0		0		1	NM_019044	0
cg25598890	0.548076	0.315519	0.232557	NR_031766	TESC		0		0		0		0		0		0		0		2	NM_001168325;NM_017899	1	NR_031766
cg06844930	0.33648	0.102109	0.234372	NM_020337	ANKRD50		2	NM_001167882;NM_020337	0		0		0		0		0		0		0		0
cg11760395	0.421598	0.176378	0.24522				0		0		0		0		0		0		0		0		0
cg05622577	0.588928	0.333538	0.25539				0		0		0		0		0		0		0		0		0
cg07063068	0.546905	0.289472	0.257433	NM_003485 **	GPR68		0		0		0		0		0		0		1	NM_003485	0		0
cg22328837	0.714287	0.455429	0.258858	NM_001015051	RUNX2		0		0		0		0		0		0		0		3	NM_001015051;NM_001024630;NM_004348	0
cg10814005	0.503879	0.242991	0.260888	NM_003485 **	GPR68		0		0		0		0		0		0		1	NM_003485	0		0
cg02244263	0.58236	0.303483	0.278876				0		0		0		0		0		0		0		0		0
cg00722081	0.554605	0.273419	0.281186				0		0		0		0		0		0		0		0		0
cg26877720	0.508709	0.219175	0.289534	NM_031453	FAM107B		0		0		0		0		0		0		0		1	NM_031453	0
CpG sites with increased or decreased methylation in live infected versus heat killed treated human macrophages.
624 CpG sites with increased or decreased methylation in live infected versus heat killed human macrophages as identified by Illumina Infinium Human Methylation 450 BeadChip array technology followed by ANOVA analysis. Genes that are listed multiple times are marked with ** (two times), *** (three times) or **** (four times). Genes printed in bold were also identified with increased or decreased …
